# Supplementary material for: Seed surface doping-mediated seeded growth of Au–Ag Janus nanoparticles with tunable sizes and multiple plasmonic absorption modes
Source: Royal Society of Chemistry journal article supplement (doi:10.1039/d2ce00962e), 2022-01-01
Supplement: d2ce00962e1.pdf [file d2ce00962e1.pdf]

## Supporting Information

# Seed Surface Doping-Mediated Seeded Growth of Au-Ag Janus Nanoparticles with Tunable Sizes and Multiple Plasmonic Absorption Modes

Yuhan Kong,<sup>a</sup> Gongguo Zhang,<sup>a</sup> Chunyu Wang,<sup>a</sup> Yanyun Ma,<sup>b\*</sup> Yiqun Zheng<sup>a\*</sup>

<sup>a</sup> School of Chemistry, Chemical Engineering, and Materials, Jining University, Qufu, Shandong 273155, China

<sup>b</sup> Institute of Functional Nano&Soft Materials (FUNSOM), Jiangsu Key Laboratory of Advanced Negative Carbon Technologies, Soochow University, Suzhou, Jiangsu 215123, China

\* Corresponding author: Prof. Dr. Y. Zheng, E-mail: whzyq@163.com;

Prof. Dr. Y. Ma, E-mail: mayanyun@suda.edu.cn

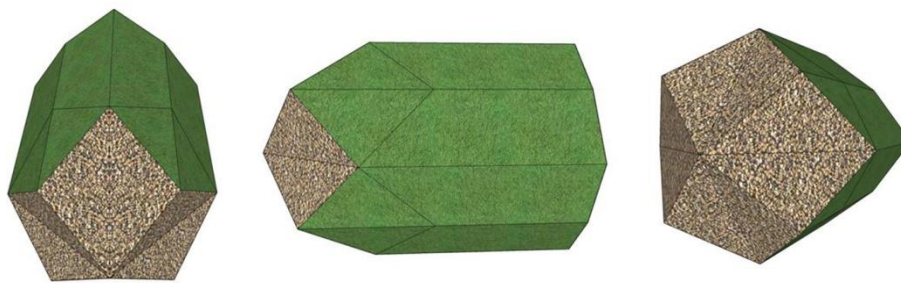

**Figure S1.** Model images of Au-Ag JNPs.

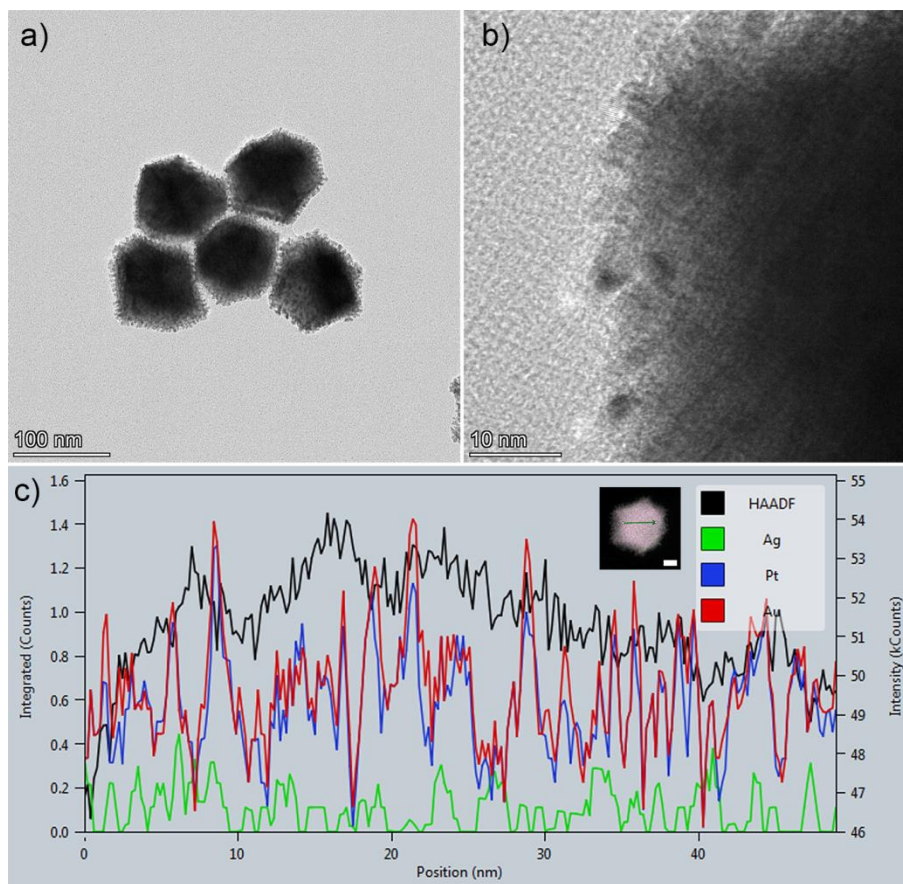

**Figure S2.** Morphology and structure characterizations of Pt/Ag doped TOH Au seeds: a) TEM; b) HRTEM; c) line-scan profile. The inset in c) shows the HAADF-STEM image of corresponding particle, where the green line indicates the scanning region.

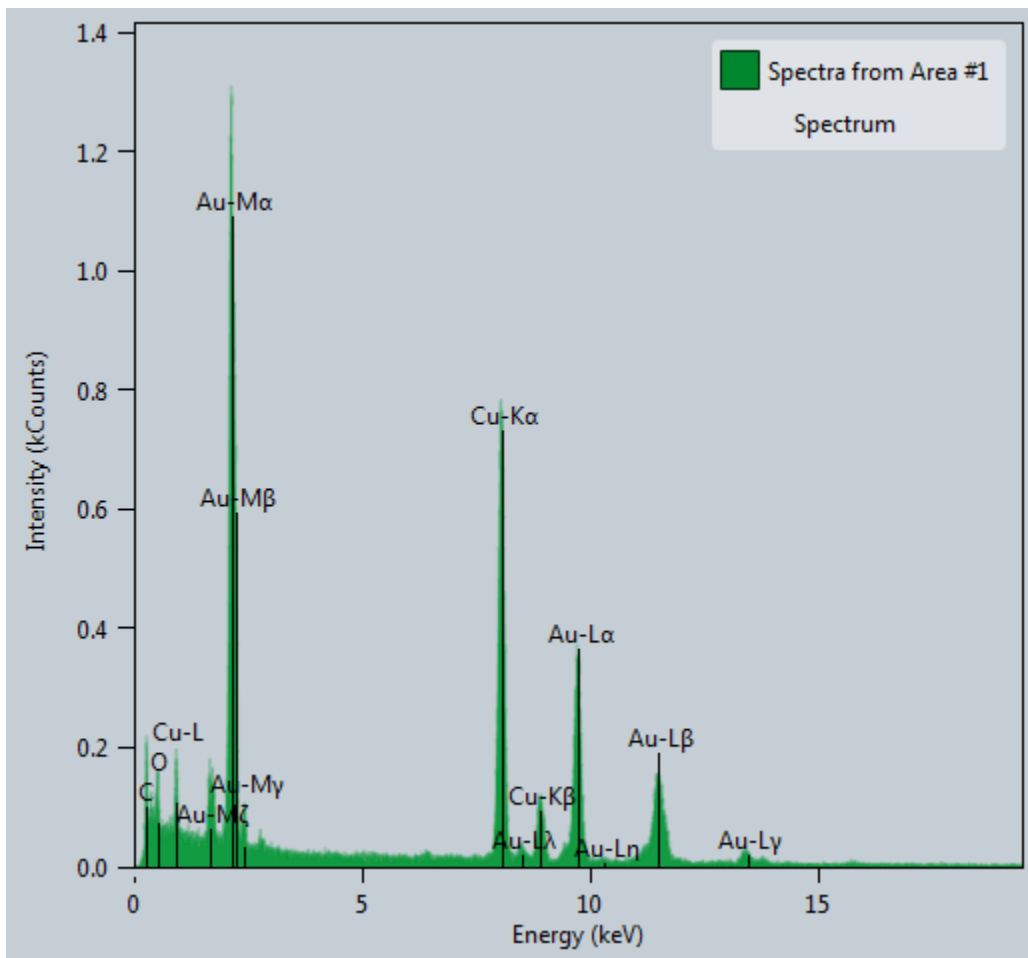

**Figure S3.** EDS spectrum of Pt/Ag doped TOH Au seeds.

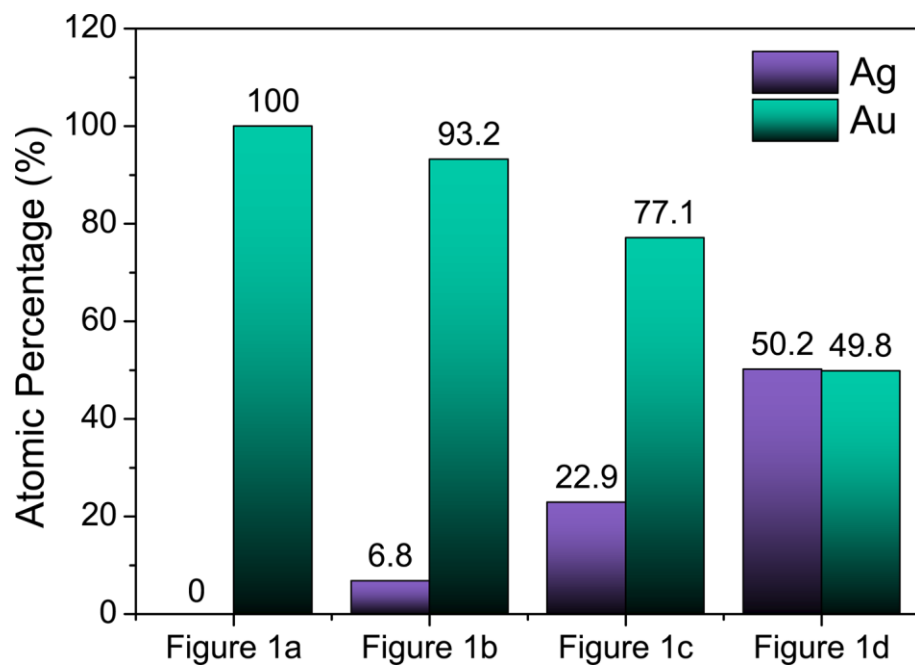

**Figure S4.** Histograms comparing the atomic ratio of Au/Ag for products shown in Figure 1.

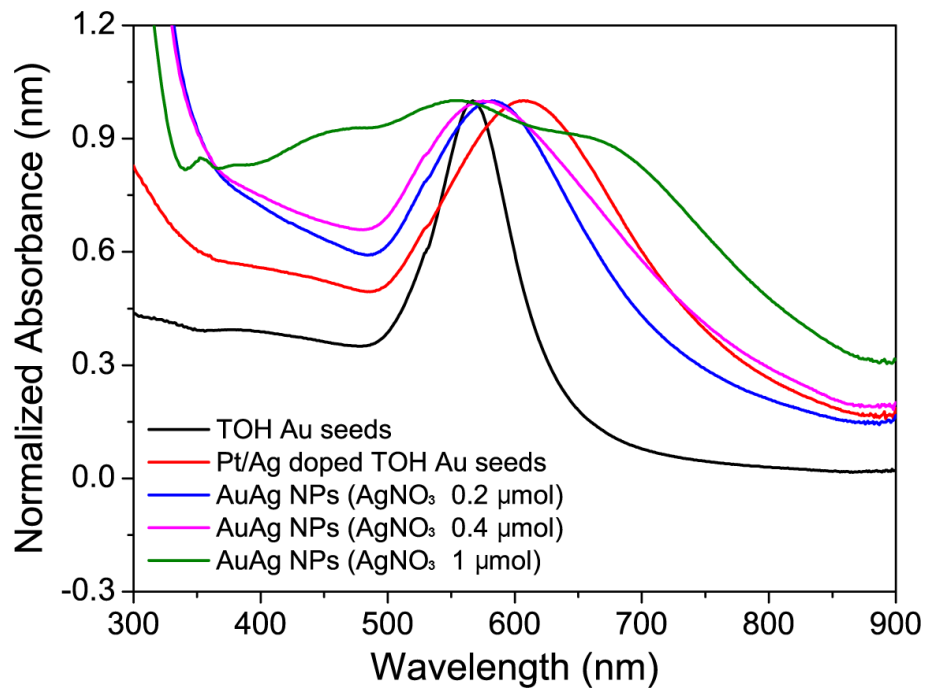

**Figure S5.** UV-vis extinction spectra of products formed during the synthetic process of Au-Ag JNPs.

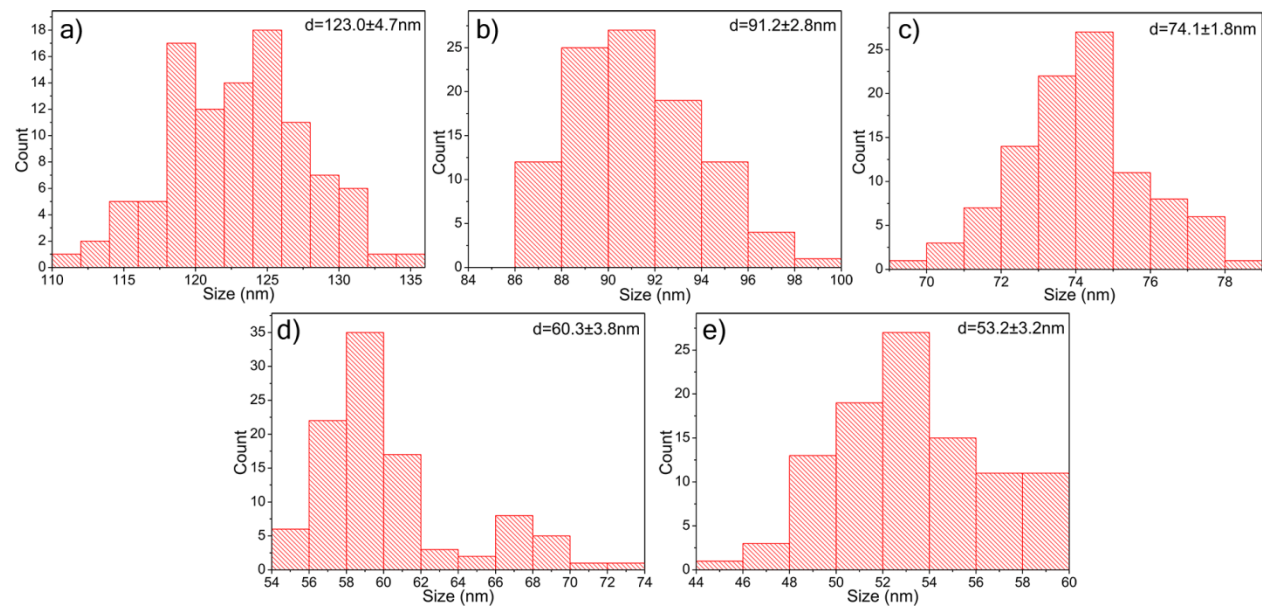

**Figure S6.** Histogram showing the size distributions of Au and Ag parts in Au-Ag JNPs: a) Au-Ag JNP-I; b) Au-Ag JNP-II; c) Au-Ag JNP-III; d) Au-Ag JNP-IV; e) Au-Ag JNP-V.

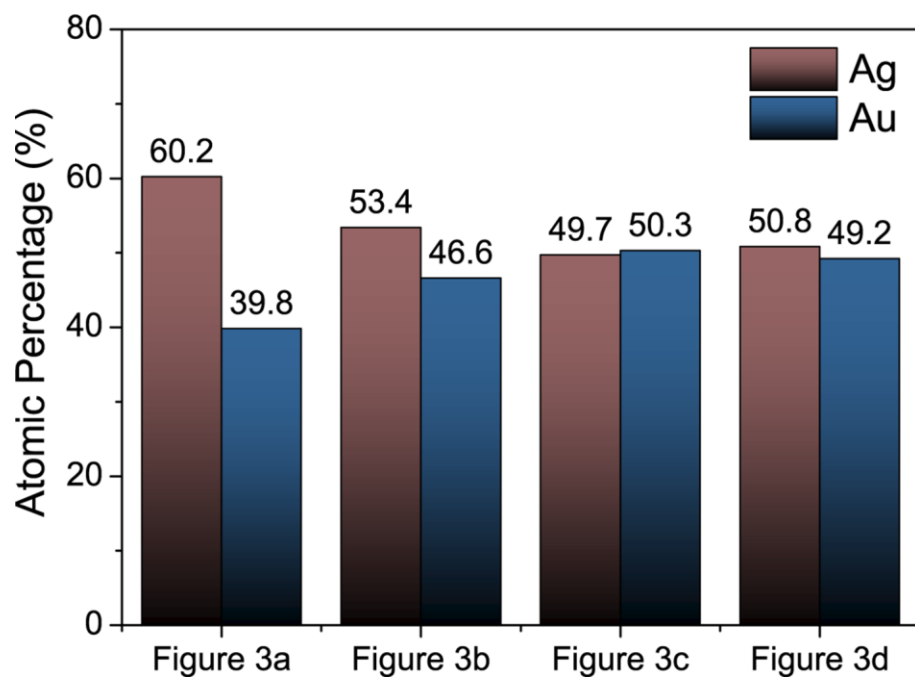

**Figure S7.** Histograms comparing the atomic ratio of Au/Ag for products shown in Figure 3.



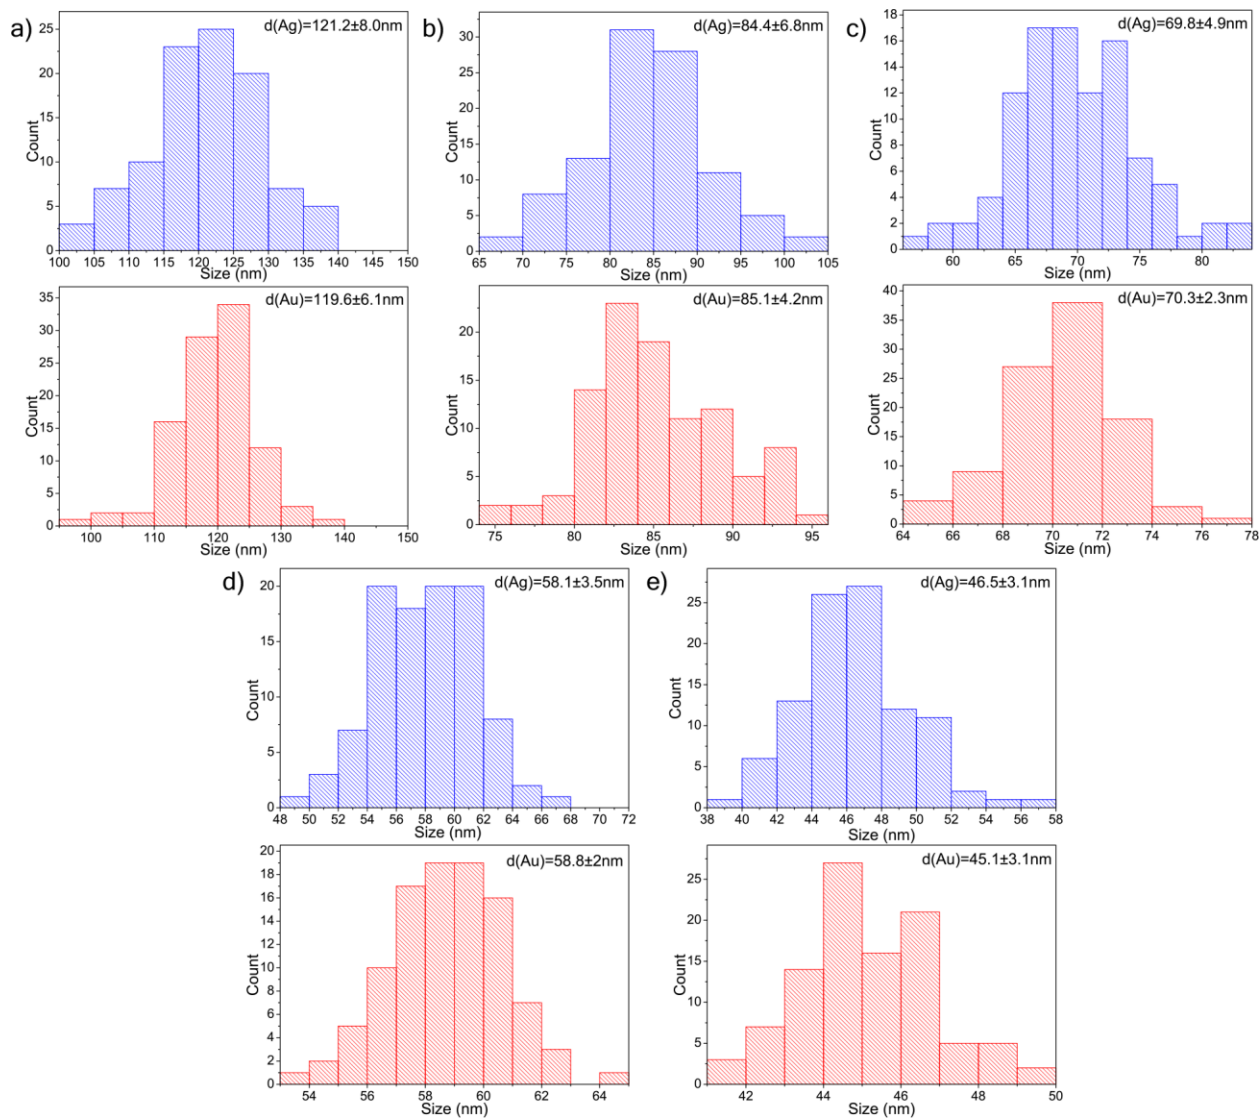

**Figure S8.** Histogram showing the size distributions of Au@Ag CSNPs: a) Au@Ag CSNP-I; b) Au@Ag CSNP-II; c) Au@Ag CSNP-III; d) Au@Ag CSNP-IV; e) Au@Ag CSNP-V.

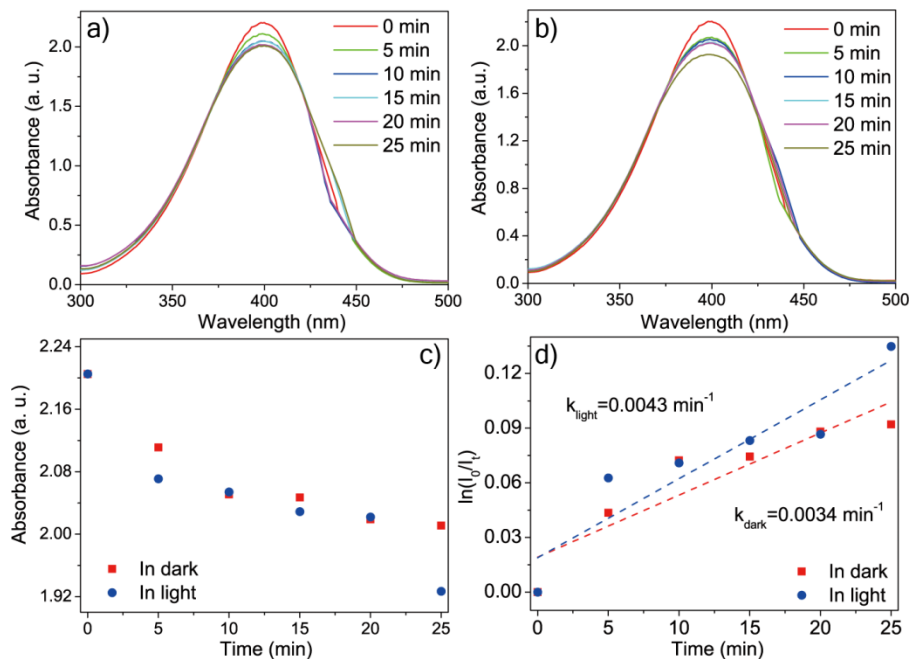

**Figure S9.** Results of 4-NP reduction using no metal catalyst. a, b) Time-dependent UV-vis extinction spectra recorded a) in dark and b) in light; c, d) Plots showing c) the absorbance and d)  $\ln(I_0/I_t)$  versus reaction time.
